# Supplementary material for: Multiorgan failure with abnormal receptor metabolism in mice mimicking Samd9/9L syndromes
Source: JCI journal article supplement (doi:10.1172/jci140147), 2020-12-29
Supplement: sd1 [file 1]

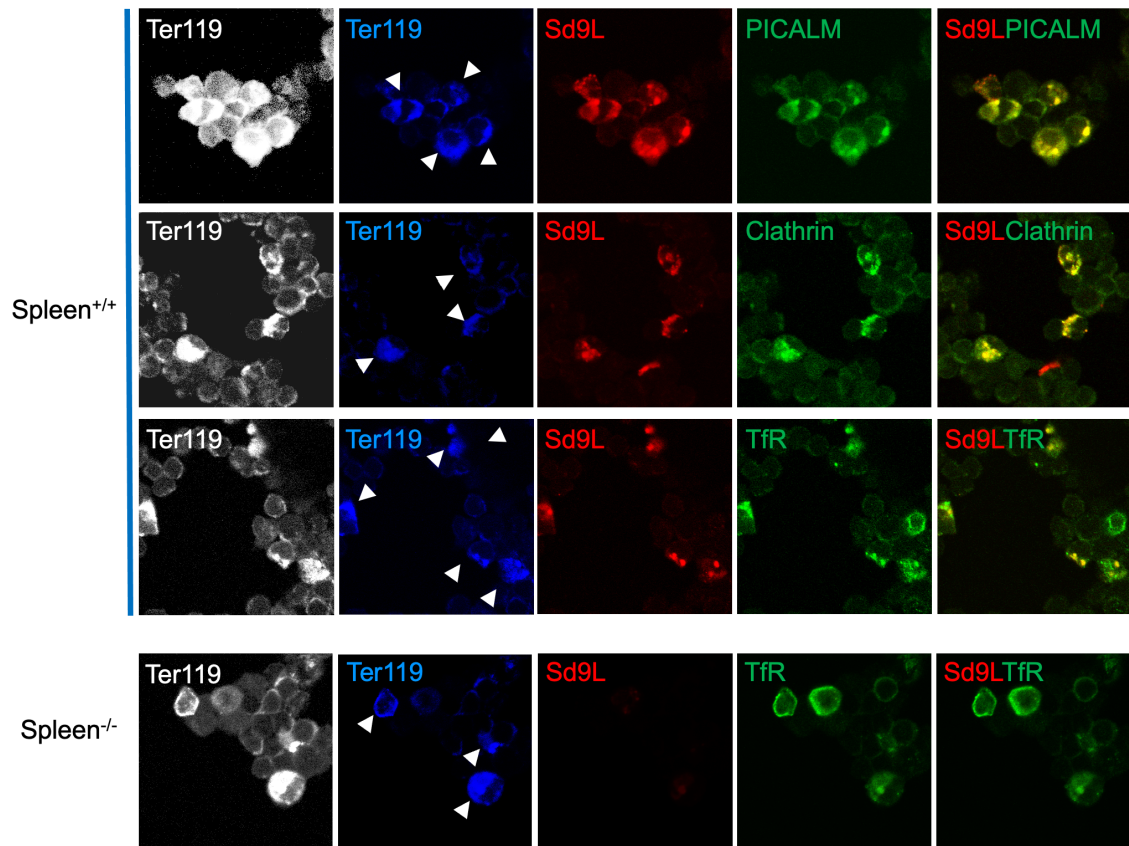

**Figure S1 Co-localization of Samd9L with PICALM, Clathrin or TfR in erythroblasts**

Splenic cells from 5-week-old mice were fixed with paraformaldehyde and stained with the antibodies indicated in the figure. The leftmost panels are overexposed images to indicate the location of cells. Arrowheads indicate cells positive for Ter119.

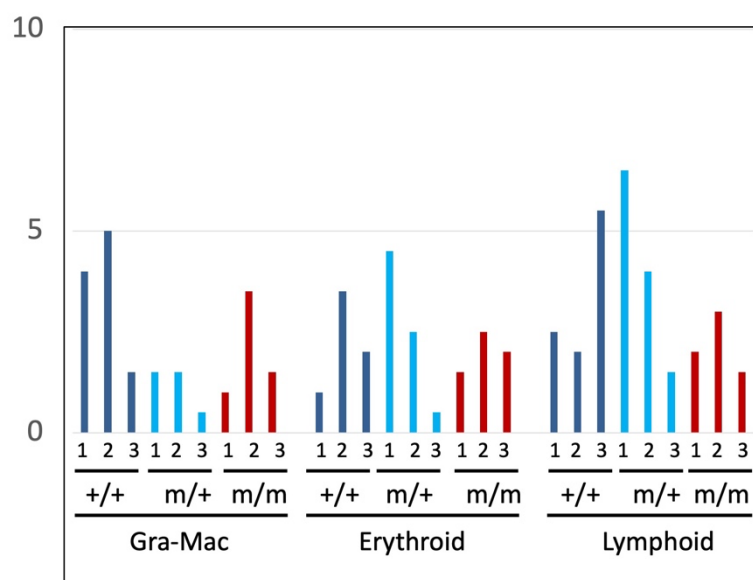

**Figure S2 Percentage of bone marrow cells carrying one dot by interphase FISH analysis**

Bone marrow cells from mice<sup>+/+</sup>, mice<sup>m/+</sup>, and mice<sup>m/m</sup> (n=3, each) divided into granulocyte-macrophage (Gra-Mac), erythroid and lymphoid lineages were hybridized with a fluorescence-labeled BAC (RP11-680N14) DNA probe that contained the *Samd9L* gene. Percentages of cells carrying one dot are shown.

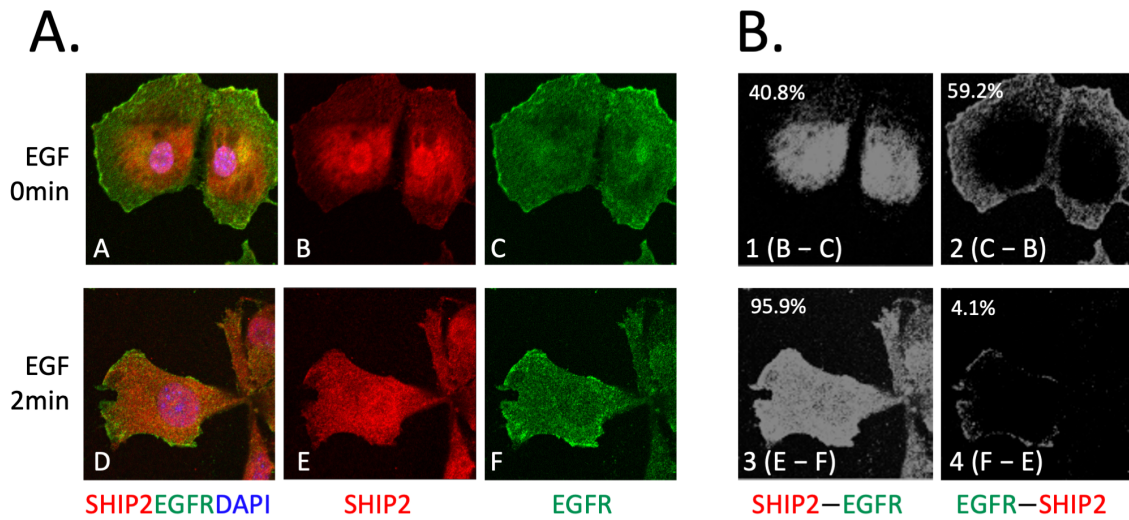

**Figure S3 Definition of "perinuclear Ship2 localization" and "diffuse Ship2 localization"**

Lung fibroblasts (LF) from mice<sup>+/+</sup> cultured in medium containing EGF (10 ng/mL) for the periods indicated on the left. (A) Cells were stained with antibodies indicated below. (B) Fluorescence signals were subtracted using ImageJ software under an appropriate threshold, which was constant throughout the analysis. Percentages of regions where red signal (Ship2) > green signal (EGFR) (panels 1 and 3) and vice versa (panels 2 and 4) are indicated upper left. "Perinuclear Ship2 localization" was defined as the percentage of area (Ship2 > EGFR) that was 80% or less (panel 1), whereas "diffuse Ship2 localization" was defined as 80% or more (panel 3).
